# Supplementary material for: Total Aglycones from Marsdenia tenacissima Increases Antitumor Efficacy of Paclitaxel in Nude Mice
Source: PubMed Central journal article supplement (PMC6271049; doi:10.3390/molecules190913965), 2014-09-05
Supplement: molecules-19-13965-s001.pdf [file molecules-19-13965-s001.pdf]

## Supplementary Materials

- 1: 11 $\alpha$ -*O*-Tigloyl-12 $\beta$ -*O*-acetyl-tenacigenin B (C<sub>28</sub>H<sub>30</sub>O<sub>7</sub>); ESI-MS: *m/z* 511.5 ([M+Na]<sup>+</sup>)
- 2: 11 $\alpha$ ,12 $\beta$ -di-*O*-Tigloyl-tenacigenin B (C<sub>31</sub>H<sub>44</sub>O<sub>7</sub>); ESI-MS: *m/z* 551.4 ([M+Na]<sup>+</sup>)
- 3: 11 $\alpha$ -*O*-2-Methylbutanoyl-12 $\beta$ -*O*-tigloyl-tenacigenin B (C<sub>31</sub>H<sub>46</sub>O<sub>7</sub>); ESI-MS: *m/z* 553.4 ([M+Na]<sup>+</sup>)
- 4: 11 $\alpha$ -*O*-2-Methylbutanoyl-12 $\beta$ -*O*-benzoyl-tenacigenin B (C<sub>33</sub>H<sub>44</sub>O<sub>7</sub>); ESI-MS: *m/z* 575.3 ([M+Na]<sup>+</sup>)

**Table S1.** Peak area of detectable component in ETA (mAU). HPLC condition: Phenomenex Luna C<sub>18</sub> column (4.6 × 250 mm, 5  $\mu$ m); oven temperature: 30 °C; detecting wavelength: 230 nm; mobile phase: methanol (A) and 0.1% aqueous acetic acid (v/v, B); gradient elution: 0–30 min, 58%–63% A; 30–40 min, 63%–68% A; 40–70 min, 68%–78% A.

| No. of Peak | Peak Area (mAU) | Area % |
|-------------|-----------------|--------|
| 1 (1)       | 196.21          | 20.09  |
| 2 (2)       | 119.47          | 12.23  |
| 3 (3)       | 40.31           | 4.13   |
| 4 (4)       | 55.58           | 5.69   |
| 5           | 62.07           | 6.35   |
| 6           | 36.35           | 3.72   |
| 7           | 24.43           | 2.50   |
| 8           | 158.20          | 16.20  |
| 9           | 11.44           | 1.17   |
| 10          | 35.71           | 3.66   |
| 11          | 44.52           | 4.56   |
| 12          | 24.12           | 2.47   |
| 13          | 14.23           | 1.46   |
| 14          | 14.07           | 1.44   |
| 15          | 10.05           | 1.03   |
| 16          | 8.52            | 0.87   |
| 17          | 27.56           | 2.82   |
| 18          | 61.86           | 6.33   |
| 19          | 32.06           | 3.28   |
| Sum         | 976.77          | 100    |

**Table S2.**  $^{13}\text{C}$ -NMR data for compounds **1–4** in  $\text{CDCl}_3$  (100 MHz,  $\delta$ : ppm).

| <b>C</b> | <b>1</b> | <b>2</b> | <b>3</b> | <b>4</b> |
|----------|----------|----------|----------|----------|
| 1        | 37.1     | 37.2     | 37.5     | 37.5     |
| 2        | 31.2     | 31.4     | 31.1     | 31.0     |
| 3        | 70.4     | 70.6     | 70.4     | 70.3     |
| 4        | 38.2     | 38.4     | 38.2     | 38.2     |
| 5        | 43.9     | 44.0     | 44.0     | 44.0     |
| 6        | 26.5     | 26.7     | 26.6     | 26.6     |
| 7        | 31.7     | 31.8     | 31.7     | 31.7     |
| 8        | 66.8     | 66.9     | 66.8     | 66.9     |
| 9        | 51.1     | 51.2     | 51.0     | 51.0     |
| 10       | 38.8     | 38.8     | 38.9     | 38.9     |
| 11       | 68.6     | 68.8     | 68.5     | 68.4     |
| 12       | 75.0     | 74.7     | 74.6     | 75.3     |
| 13       | 45.7     | 46.0     | 46.0     | 46.0     |
| 14       | 71.3     | 71.5     | 71.4     | 71.4     |
| 15       | 26.5     | 26.7     | 26.5     | 26.5     |
| 16       | 24.9     | 25.0     | 24.9     | 24.9     |
| 17       | 59.7     | 59.8     | 59.9     | 59.9     |
| 18       | 16.5     | 16.6     | 16.7     | 16.7     |
| 19       | 12.6     | 12.7     | 12.7     | 12.8     |
| 20       | 210.8    | 210.9    | 210.8    | 210.8    |
| 21       | 30.0     | 30.2     | 29.9     | 29.9     |
| Acyl1    | Tig      | Tig      | Bu       | Bu       |
| 1        | 167.2    | 167.3    | 175.7    | 175.7    |
| 2        | 128.5    | 127.9    | 41.3     | 41.1     |
| 3        | 138.0    | 137.7    | 25.8     | 25.7     |
| 4        | 14.4     | 14.3     | 11.6     | 11.4     |
| 5        | 11.9     | 11.7     | 15.1     | 15.0     |
| Acyl2    | Ac       | Tig      | Tig      | Bz       |
| 1        | 170.7    | 167.4    | 167.3    | 166.0    |
| 2        | 20.5     | 128.7    | 128.0    | 129.4    |
| 3        |          | 138.0    | 138.5    | 129.8    |
| 4        |          | 14.3     | 14.4     | 128.4    |
| 5        |          | 11.8     | 11.8     | 133.2    |
| 6        |          |          |          | 128.4    |
| 7        |          |          |          | 129.8    |

**Table S3.**  $^1\text{H-NMR}$  data for compound **1–4** in  $\text{CDCl}_3$  (400 MHz;  $\delta$ : ppm;  $J$ : Hz).

| <b>H</b> | <b>1</b>            | <b>2</b>            | <b>3</b>            | <b>4</b>            |
|----------|---------------------|---------------------|---------------------|---------------------|
| C-3      | 3.556 (1H, m)       | 3.559 (1H, m)       | 3.574 (1H, m)       | 3.587 (1H, m)       |
| C-9      | 2.008 (1H, d, 10.0) | 2.018 (1H, d, 10.4) | 2.003 (1H, d, 10.4) | 2.065 (1H, d, 10.4) |
| C-11     | 5.393 (1H, t, 10.0) | 5.449 (1H, t, 10.0) | 5.389 (1H, t, 10.0) | 5.523 (1H, t, 10.0) |
| C-12     | 4.992 (1H, d, 10.0) | 5.032 (1H, d, 10.4) | 5.023 (1H, d, 10.0) | 5.222 (1H, d, 10.0) |
| C-17     | 2.907 (1H, d, 7.6)  | 2.907 (1H, d, 7.2)  | 2.897 (1H, d, 7.2)  | 2.962 (1H, d, 7.2)  |
| C-18     | 1.082 (3H, s)       | 1.091 (3H, s)       | 1.063 (3H, s)       | 1.139 (3H, s)       |
| C-19     | 1.045 (3H, s)       | 1.052 (3H, s)       | 1.040 (3H, s)       | 1.074 (3H, s)       |
| C-21     | 2.171 (3H, s)       | 2.185 (3H, s)       | 2.201 (3H, s)       | 2.253 (3H, s)       |
| Acyl1    | Tig                 | Tig                 | Bu                  | Bu                  |
| C-4'     | 1.732 (3H, brs)     | 1.683 (3H, d, 7.2)  | 0.773 (3H, t, 7.6)  | 0.535 (3H, t, 7.6)  |
| C-5'     | 1.747 (3H, s)       | 1.729 (3H, s)       | 0.958 (3H, d, 7.2)  | 0.836 (3H, d, 7.2)  |
| Acyl2    | Ac                  | Tig                 | Tig                 | Bz                  |
| C-2''    | 1.834 (3H, s)       |                     |                     |                     |
| C-3''    |                     |                     |                     | 7.937 (1H, d, 7.2)  |
| C-4''    |                     | 1.683(3H, d, 7.2)   | 1.735 (3H, d, 5.6)  | 7.369 (1H, t, 7.6)  |
| C-5''    |                     | 1.729 (3H, s)       |                     | 7.532 (1H, t, 7.6)  |
| C-6''    |                     |                     |                     | 7.369 (1H, t, 7.6)  |
| C-7''    |                     |                     |                     | 7.937 (1H, d, 7.2)  |
